# Supplementary material
Source: publisher figshare collection journal article supplement (https://frontiersin.figshare.com/ndownloader/files/21931158)
Supplement: Supplementary file 1 [file 21931158]

## Sheet: Sheet4
S5: ANOVA of average co-occurrence correlation between NGS sequences assigned to cultures displaying antipathogen activity, with the remaining community. ANOVA detects for significant differences between all fungal co-occurences and all bacterial co-occurences
NGS Name	Code	Sum Sq.	Mean Sq.	F	Pr(>F)	P
Nebediv_FungyITS_pool1_174191_CONS_SUB_SUB	Fung01	0.101	0.10064	4.965	0.0261	*
Residuals		16.985	0.02027
Nebediv_FungyITS_pool1_415411_CONS_SUB_SUB	Fung02	0.388	0.388	17.57	3.06e-05	***
Residuals		18.502	0.01539
Nebediv_FungyITS_pool1_415411_CONS_SUB_SUB	Fung03	0.029	0.0292	1.897	0.169
Residuals		12.895	0.01539
Nebediv_FungyITS_pool1_46131_CONS_SUB_SUB	Fung04	0.144	0.14401	11.83	0.000611	***
Residuals		10.2	0.01217
Posidonies_Bact_Lib1_3402602_CONS_SUB_SUB	Bact 01	0.929	0.929	42.55	1.19e-10	***
Residuals		18.302	0.0218
Posidonies_Bact_Lib1_4239402_CONS_SUB_SUB_CMP	Bact 02	0.065	0.065	9.007	0.002277	**
Residuals		6.047	0.00722
Posidonies_Bact_Lib1_532341_CONS_SUB_SUB_CMP	Bact 03	1.075	1.0746	51.68	1.45e-12	***
Residuals		17.425	0.0208
Posidonies_Bact_Lib1_5638733_CONS_SUB_SUB	Bact 04	0.017	0.017242	3.383	0.0663
Residuals		4.272	0.005098
Posidonies_Bact_Lib1_861_CONS_SUB_SUB_CMP	Bact 05	0.558	0.5577	30.41	4.67e-08	***
Residuals		15.372	0.0183
